# Supplementary material
Source: ML conference proceedings conference paper supplement (https://openaccess.thecvf.com/content/CVPR2026/html/Feng_RDFace_A_Benchmark_CVPR_2026_paper.html)
Supplement: Supplementary file 1 [file Feng_RDFace_A_Benchmark_CVPR_2026_supplemental.pdf]

# RDFace: A Benchmark Dataset for Rare Disease Facial Image Analysis under Extreme Data Scarcity and Phenotype-Aware Synthetic Generation

## Supplementary Material

### Appendix Contents

|                                                                                |           |
|--------------------------------------------------------------------------------|-----------|
| <b>A Dataset documentation</b>                                                 | <b>2</b>  |
| A.1 Disease list and metadata . . . . .                                        | 2         |
| A.2 Dataset distribution and organization . . . . .                            | 5         |
| <b>B Few-shot learning</b>                                                     | <b>6</b>  |
| B.1. Prototypical networks algorithm . . . . .                                 | 6         |
| <b>C Synthetic image samples</b>                                               | <b>7</b>  |
| <b>D Expert and automated evaluation of synthetic data</b>                     | <b>9</b>  |
| D.1. Landmark-based similarity analysis . . . . .                              | 9         |
| D.1.1. Heatmap of landmark-based cosine similarities . . . . .                 | 9         |
| D.1.2. Ranking consistency of DreamBooth-generated Images . . . . .            | 10        |
| D.2 Expert review . . . . .                                                    | 10        |
| D.3 Observations and implications . . . . .                                    | 11        |
| <b>E Tradeoff between disease-specific structure and visual realism</b>        | <b>12</b> |
| <b>F Synthetic data-involved downstream tasks results</b>                      | <b>13</b> |
| F.1. Standard supervised classification and synthetic scaling effect . . . . . | 13        |
| F.2. Few-shot learning . . . . .                                               | 15        |
| F.3. Observations . . . . .                                                    | 15        |
| <b>G VLM-based report generation</b>                                           | <b>16</b> |
| G.1. Prompt design . . . . .                                                   | 16        |
| G.2 Report evaluation . . . . .                                                | 16        |
| G.3 Uncertainty and robustness analysis . . . . .                              | 18        |
| <b>H Regional analysis and potential bias</b>                                  | <b>19</b> |
| <b>I. Statistical reporting details</b>                                        | <b>20</b> |
| <b>J. Hyperparameter settings and training details</b>                         | <b>20</b> |
| J.1. Standard supervised classification . . . . .                              | 20        |
| J.2. Few-Shot learning . . . . .                                               | 20        |
| J.3. Synthetic data generation . . . . .                                       | 21        |
| J.4. Hardware and compute resources . . . . .                                  | 21        |

## A. Dataset documentation

### A.1. Disease list and metadata

We provide a complete list of the 103 rare disease classes included in the RDFace dataset. As summarized in Table S1, each entry includes the disease name, abbreviation (Abbr) (used for labeling), associated gene (if available), clinical subcategory based on Orphanet (if available), Orphanet code, and the number of real facial images (# Img) curated for that class.

Table S1. Metadata of rare disease classes in the RDFace dataset.<sup>1</sup>

| Disease Name                                           | Abbr | Gene                               | Subcategory                                                 | Orphanet Code | # Img |
|--------------------------------------------------------|------|------------------------------------|-------------------------------------------------------------|---------------|-------|
| Aarskog-Scott syndrome                                 | AAR  | FGD1                               | Delayed puberty                                             | 915           | 5     |
| Aicardi-Goutieres                                      | AIC  | TREX1                              | ?                                                           | 51            | 5     |
| Triple A syndrome                                      | ALL  | AAAS                               | multisystem disease                                         | 869           | 5     |
| Allan-herndon-dudley Syndrome                          | ALLA | SLC16A2                            | Ataxia                                                      | 59            | 5     |
| Alport syndrome                                        | ALP  | ?                                  | Abnormal retinal morphology                                 | 63            | 4     |
| Alpha-thalassemia                                      | ALPH | ?                                  | Cholestasis                                                 | 846           | 5     |
| Alpha-mannosidase deficiency                           | ALPM | MAN2B1                             | lysosomal storage disease                                   | 61            | 5     |
| Alstrom                                                | ALS  | ALSM1                              | multisystemic disorder                                      | 64            | 5     |
| Angelman Syndrome                                      | ANG  | UBE3A                              | Intellectual disability                                     | 72            | 5     |
| X-linked cleft palate and ankyloglossia                | ANK  | TBX22                              | developmental defect during embryogenesis syndrome          | 324601        | 2     |
| Apert syndrome                                         | APE  | FGFR2                              | Cardiomyopathy                                              | 87            | 5     |
| AR Polycystic Kidney Disease                           | ARP  | PKHD1                              | hepatorenal fibrocystic syndrome                            | 731           | 1     |
| Arterial Tortuosity                                    | ART  | ?                                  | connective tissue disorder                                  | 3342          | 5     |
| Ataxia Telangiectasia                                  | ATA  | ATM                                | combined dystonia                                           | 100           | 2     |
| Atypical Rett Syndrome                                 | ATYP | MECP2,<br>GABBR2,<br>STXBP1, CDKL5 | Calcium nephrolithiasis                                     | 3095          | 5     |
| Auriculocondylar Syndrome                              | AURI | EDN1, PLCB4,<br>GNAI3              | Abnormal soft palate morphology to abnormality of the uvula | 137888        | 5     |
| Bainbridge-ropers Syndrome                             | BAI  | ASXL3                              | Severe postnatal growth retardation                         | 352577        | 5     |
| Bardet-Biedl                                           | BAR  | BBS2                               | ciliopathy with multisystem involvement                     | 110           | 5     |
| Barber-say Syndrome                                    | BARB | TWIST2                             | Hyperextensible skin                                        | 1231          | 5     |
| Barth syndrome                                         | BART | ?                                  | Cardiomyopathy                                              | 111           | 5     |
| Beckwith-wiedemann Syndrome                            | BEC  | ?                                  | Multiple renal cysts                                        | 116           | 5     |
| Bohring-opitz Syndrome                                 | BOH  | ASXL1                              | Muscular hypotonia                                          | 97297         | 5     |
| Boycott-Beaulieu-Innes                                 | BOY  | THOC6                              | syndromic intellectual disability disorder                  | 363444        | 5     |
| Congenital adrenal hyperplasia                         | CAH  | ?                                  | Congenital adrenal hyperplasia                              | 418           | 5     |
| Canavan Disease                                        | CAN  | ASPA                               | Abnormality of serum amino acid level                       | 141           | 5     |
| COFS syndrome                                          | CER  | ERCC6                              | diseases of DNA repair                                      | 1466          | 5     |
| Chudley-McCullough                                     | CHU  | GPSM2                              | syndromic deafness                                          | 314597        | 4     |
| Cleidocranial Dysplasia                                | CLE  | CBFA1                              | developmental abnormality of bone                           | 1452          | 5     |
| Clouston Syndrome                                      | CLOU | GJB6                               | Ectodermal dysplasia                                        | 189           | 4     |
| CODAS                                                  | COD  | LONP1                              | multiple congenital anomalies syndrome                      | 1458          | 5     |
| Coffin-lowry Syndrome                                  | COF  | RPS6KA3                            | Spasticity                                                  | 192           | 5     |
| Combined pituitary hormone deficiencies, genetic forms | COM  | PROP1                              | Congenital hypopituitarism                                  | 95494         | 4     |
| SLC39A8-CDG                                            | COND | SLC39A8                            | ?                                                           | 468699        | 5     |

| Disease Name                                             | Abbr | Gene                           | Subcategory                                      | Orphanet Code | # Img |
|----------------------------------------------------------|------|--------------------------------|--------------------------------------------------|---------------|-------|
| Cranioectodermal dysplasia                               | CRA  | DPH1                           | developmental disorder                           | 1515          | 5     |
| Crisponi Syndrome                                        | CRIS | CLCF1, CRLF1                   | Malignant hyperthermia                           | 1545          | 5     |
| 3C syndrome                                              | CSY  | CCDC22,<br>WASHC5              | ?                                                | 7             | 5     |
| Cushing disease                                          | CUS  | USP8, CDH23                    | Abnormal bleeding                                | 96253         | 4     |
| Cystic Fibrosis                                          | CYS  | CFTR                           | ?                                                | 586           | 5     |
| Diamond-blackfan Anemia                                  | DIA  | RPS19                          | Colon cancer                                     | 124           | 5     |
| Donnai-barrow Syndrome                                   | DON  | LRP2                           | Partial agenesis of the corpus callosum          | 2143          | 5     |
| DOORS syndrome                                           | DOO  | TBC1D24                        | Hypothyroidism                                   | 79500         | 5     |
| Dopa-Responsive Dystonia                                 | DOP  | TH                             | group of diseases                                | 255           | 3     |
| Dysosteosclerosis                                        | DYS  | ?                              | primary bone dysplasia disease                   | 1782          | 2     |
| Early infantile epileptic encephalopathy                 | EPIE | ?                              | epileptic encephalopathy                         | 1934          | 5     |
| Fanconi Anemia                                           | FANC | FANCC                          | DNA repair disorder                              | 84            | 5     |
| Geroderma Osteodysplastica                               | GEO  | GORAB                          | ?                                                | 2078          | 5     |
| Glutaryl-CoA dehydrogenase deficiency                    | GLU  | GCDH                           | neurometabolic disorder                          | 25            | 5     |
| HHH (hyperornithinemia-hyperammonemia-homocitrullinuria) | HHH  | SLC25A15                       | disorder of urea cycle metabolism                | 415           | 1     |
| Hypohidrotic Ectodermal Dysplasia                        | HYPE | EDA1                           | disorder of ectoderm development                 | 238468        | 1     |
| Hypophosphatasia                                         | HYPO | ALPL                           | metabolic disorder                               | 436           | 5     |
| Severe combined immunodeficiency                         | IMMU | DCLRE1C                        | primary immunodeficiency                         | 183660        | 5     |
| Joubert Syndrome                                         | JOUA | TMEM237                        | ?                                                | 475           | 5     |
| Juvenile Amyotrophic Lateral Sclerosis                   | JUV  | ALS2,<br>HNRNPA2B1,<br>HNRNPA1 | Motor neuron atrophy                             | 300605        | 5     |
| Kawasaki Disease                                         | KAW  | ?                              | Arrhythmia                                       | 2331          | 5     |
| Infantile Krabbe Disease                                 | KRA  | GALC, PSAP                     | Generalized myoclonic seizure                    | 206436        | 5     |
| Laron Syndrome                                           | LAR  | GHR                            | Hypoglycemia                                     | 633           | 3     |
| Leigh                                                    | LEI  | NDUFV1                         | progressive neurological disease                 | 506           | 5     |
| Leprechaunism                                            | LEP  | INSR                           | Hypoglycemia                                     | 508           | 7     |
| Loeys-Dietz                                              | LOE  | TGFB2                          | connective tissue disorder                       | 60030         | 5     |
| Malignant hyperthermia of anesthesia                     | MAL  | RYR1                           | pharmacogenetic disorder of skeletal muscle      | 423           | 3     |
| Maple Syrup Urine Disease                                | MAP  | BCKDHB                         | disorder of branched-chain amino acid metabolism | 511           | 5     |
| Marden-walker Syndrome                                   | MAR  | PIEZO2                         | Muscular dystrophy                               | 2461          | 5     |
| Marinesco-sjögren Syndrome                               | MARI | INPP5K, SIL1                   | Muscular dystrophy                               | 559           | 5     |
| Oculotrichoanal syndrome                                 | MBO  | FREM1                          | multiple congenital anomalies                    | 2717          | 5     |
| Mucopolysaccharidosis type 4                             | MOR  | ?                              | lysosomal storage disease                        | 582           | 5     |
| Mowat-wilson Syndrome                                    | MOW  | ZEB2                           | Abdominal distention                             | 2152          | 5     |
| Mucopolysaccharidosis type 7                             | MPS  | GUSB                           | lysosomal storage disease                        | 584           | 5     |
| Multiple Sulfatase Deficiency                            | MUL  | SUMF1                          | Progressive neurologic deterioration             | 585           | 5     |
| Ochoa Syndrome                                           | OCH  | HPSE2, LRIG2                   | Renal insufficiency                              | 2704          | 5     |
| Oculocutaneous Albinism                                  | OCU  | TYR                            | disorders of melanin biosynthesis                | 55            | 5     |
| Odonto-onycho-dermal dysplasia                           | ODO  | WNT10A                         | ectodermal dysplasia                             | 2721          | 5     |
| Osteogenesis imperfecta                                  | OST  | SEPINF1                        | group of diseases                                | 666           | 5     |
| Parietal Foramina                                        | PAR  | ?                              | ?                                                | 60015         | 3     |

| Disease Name                                                        | Abbr | Gene        | Subcategory                           | Orphanet Code | # Img |
|---------------------------------------------------------------------|------|-------------|---------------------------------------|---------------|-------|
| Glycogen storage disease due to acid maltase deficiency, late-onset | POM  | GAA         | Glycogen storage disease              | 420429        | 5     |
| Pontocerebellar Hypoplasia                                          | PON  | TOE1        | ?                                     | 98523         | 5     |
| Primary Hyperoxaluria                                               | PRI  | GRHPR       | disorder of glyoxylate metabolism     | 416           | 2     |
| Microcephaly-lymphedema-chorioretinopathy syndrome                  | PRIM | ?           | ?                                     | 2526          | 5     |
| Propionic Acidemia                                                  | PRO  | PCCB        | organic aciduria                      | 35            | 5     |
| PRUNE1-related neurological syndrome                                | PRU  | PRUNE1      | ?                                     | 544469        | 2     |
| Pten Hamartoma Tumor Syndrome                                       | PTEN | ?           | Endometrial carcinoma                 | 306498        | 5     |
| Pyruvate Carboxylase Deficiency                                     | PYR  | PC          | neurometabolic disorder               | 3008          | 2     |
| Renpenning                                                          | REN  | PQBP1       | intellectual disability syndrome      | 3242          | 4     |
| Restrictive Dermopathy                                              | RES  | ZMPSTE24    | congenital genodermatosis             | 1662          | 5     |
| Rhizomelic Chondrodysplasia Punctata                                | RHO  | PEX7        | group of diseases                     | 177           | 5     |
| Roberts                                                             | ROB  | ESCO2       | ?                                     | 3103          | 5     |
| Spinal arteriovenous metameris syndrome                             | SAM  | GSC         | ?                                     | 53721         | 1     |
| Sandhoff Disease                                                    | SAND | ?           | Progressive psychomotor deterioration | 796           | 5     |
| Sialidosis type 2                                                   | SIA  | NEU1        | lysosomal storage disease             | 87876         | 5     |
| Sickle Cell Anemia                                                  | SIC  | HBB         | Chronic hemolytic anemia              | 232           | 3     |
| Proximal Spinal Muscular Atrophy                                    | SPI  | SMN1        | neuromuscular disorder                | 70            | 4     |
| Spondylodysplastic Ehlers-danlos Syndrome                           | SPO  | ?           | Platyspondyly                         | 536471        | 3     |
| Congenital sucrase-isomaltase deficiency                            | SUC  | SI          | carbohydrate intolerance disorder     | 35122         | 2     |
| Isolated sulfite oxidase deficiency                                 | SUL  | SO          | ?                                     | 99731         | 5     |
| Temple syndrome                                                     | TEMP | ?           | Maturity-onset diabetes of the young  | 254516        | 5     |
| Turner Syndrome                                                     | TUR  | ?           | Biliary cirrhosis                     | 881           | 4     |
| Tyrosinemia Type 1                                                  | TYR  | FAH         | inborn error of tyrosine catabolism   | 882           | 5     |
| Usher Syndrome type 1                                               | USHB | MYO7A       | ?                                     | 231169        | 4     |
| CACH syndrome                                                       | VAN  | EIF2B5      | ?                                     | 135           | 5     |
| Hyperostosis corticalis generalisata                                | VANB | ?           | craniotubular hyperostosis            | 3416          | 2     |
| Walker Warburg                                                      | WAL  | POMT1       | congenital muscular dystrophy         | 899           | 5     |
| Warsaw Breakage Syndrome                                            | WAR  | DDX11       | psychomotor retardation               | 280558        | 5     |
| Wolf-hirschhorn Syndrome                                            | WOL  | LETM1, NSD2 | Rib segmentation abnormalities        | 280           | 5     |
| Zellweger                                                           | ZEL  | ?           | peroxisome biogenesis disorder        | 912           | 5     |

<sup>1</sup>? indicates that the information is not available.

## A.2. Dataset distribution and organization

Aside from the metadata table, we also provide two figures to illustrate the distribution and structure of the RDFace dataset. Figure S1a shows the number of images available for each disease class, highlighting the inherent imbalance in data availability across different rare diseases. Figure S1b depicts the organization of the dataset. These visualizations provide a clearer understanding of the dataset's composition and the challenges posed by data scarcity in rare disease research.

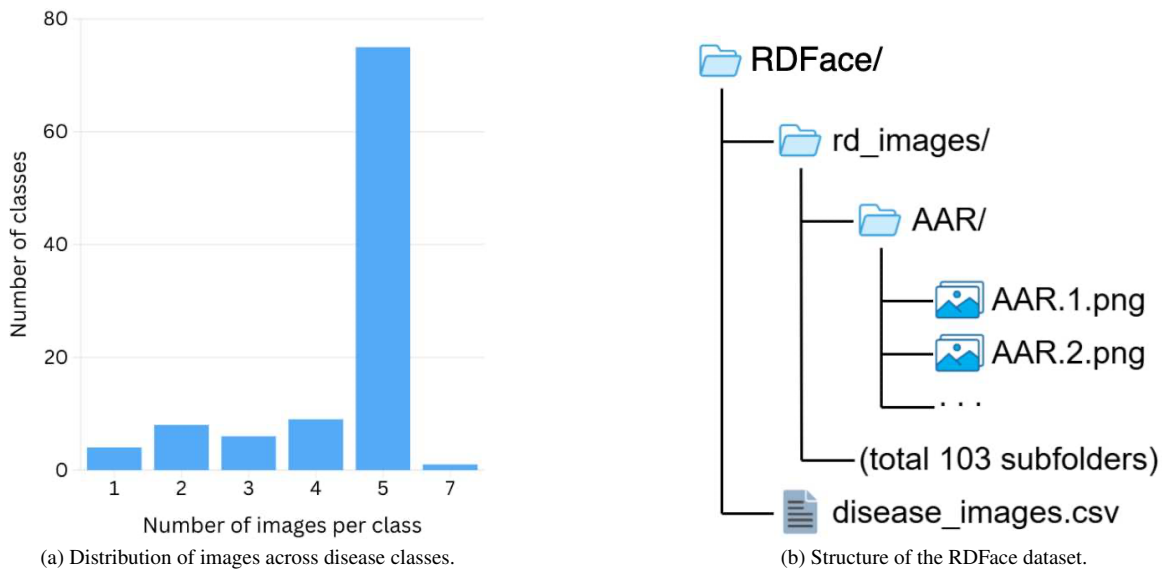

Figure S1. Overview of the RDFace dataset.

## B. Few-shot learning

Few-shot learning (FSL) addresses the problem of classifying instances when only a few labeled examples are available for each class. This setting is common in domains like rare disease diagnosis, where collecting large-scale labeled datasets is impractical due to the low prevalence and data privacy constraints.

In the standard  $n$ -way  $k$ -shot FSL setting, each learning episode involves  $n$  distinct classes, with only  $k$  labeled examples (support set) per class. The goal is to classify unlabeled examples (query set) drawn from the same  $n$  classes, using the limited support data for reference.

Formally, each episode consists of:

- A support set  $\mathcal{S} = \{(x_i, y_i)\}_{i=1}^{n \cdot k}$ , containing  $k$  samples per class.
- A query set  $\mathcal{Q} = \{(x_j, y_j)\}_{j=1}^q$ , containing unseen samples from the same  $n$  classes.

We adopted Prototypical Networks to solve the few-shot classification task on RDFace. This approach learns an embedding function  $f_\theta : \mathcal{X} \rightarrow \mathbb{R}^d$  that maps input images into a feature space. For each class  $c_i$ , a prototype (centroid) is computed as the mean embedding of its support samples:

$$\mu_i = \frac{1}{k} \sum_{x \in \mathcal{S}_i} f_\theta(x) \quad (1)$$

For each query image  $x^{(q)}$ , the model computes the distance between its embedding and each prototype  $\mu_i$ , typically using the squared Euclidean distance:

$$d(x^{(q)}, \mu_i) = \left\| f_\theta(x^{(q)}) - \mu_i \right\|_2^2 \quad (2)$$

The query image is then assigned to the class with the closest prototype, and a cross-entropy loss is computed over the predictions for optimization.

### B.1. Prototypical networks algorithm

We provide the algorithm used for episodic training on RDFace as below:

---

**Algorithm 1** Prototypical Networks Episodic Training on RDFace

---

**Require:** Feature extractor  $f_\theta$ , training classes  $\mathcal{C}_{\text{train}}$ , number of ways  $n$ , support size  $k = 1$

- 1: Sample  $n$  classes  $\{c_1, \dots, c_n\} \sim \mathcal{C}_{\text{train}}$
  - 2: **for** each class  $c_i$  **do**
  - 3:   Sample support set  $\mathcal{S}_i = \{x_i^{(s)}\}$ , query set  $\mathcal{Q}_i = \{x_i^{(q)}\}$
  - 4:   Compute prototype:  $\mu_i \leftarrow f_\theta(x_i^{(s)})$
  - 5: **end for**
  - 6: **for** each query  $x_j^{(q)} \in \bigcup_i \mathcal{Q}_i$  **do**
  - 7:   Compute distances:  $d_{ij} \leftarrow \|f_\theta(x_j^{(q)}) - \mu_i\|_2$
  - 8:   Predict label:  $\hat{y}_j \leftarrow \arg \min_i d_{ij}$
  - 9: **end for**
  - 10: Compute loss:  $\mathcal{L}_{\text{episode}} \leftarrow \text{CrossEntropy}(\hat{y}, y)$
  - 11: Update  $f_\theta$  via backpropagation
-

### C. Synthetic image samples

Figure S2 presents the top 100 synthetic facial images generated by FastGAN, ranked by their similarity to real disease faces using a landmark-based cosine metric. These samples highlight the model's ability to capture coarse facial structure across diverse rare disease classes, although occasional artifacts and inconsistencies remain visible. In contrast, Figure S3 provides a more targeted comparison using DreamBooth of 50 classes chosen to display. For each disease class, we show the most and least phenotype-consistent synthetic images compared to real images based on  $5 \times 5$  facial landmark cosine similarity. This comparison illustrates both the strength and the limitations of current generative models. While top-ranked DreamBooth samples often replicate key craniofacial traits, the bottom-ranked samples reveal potential risks of phenotype distortion or mode collapse. These visualizations support the use of generative models for phenotype augmentation, while also emphasizing the need for careful validation when applying synthetic images in clinical or diagnostic settings.

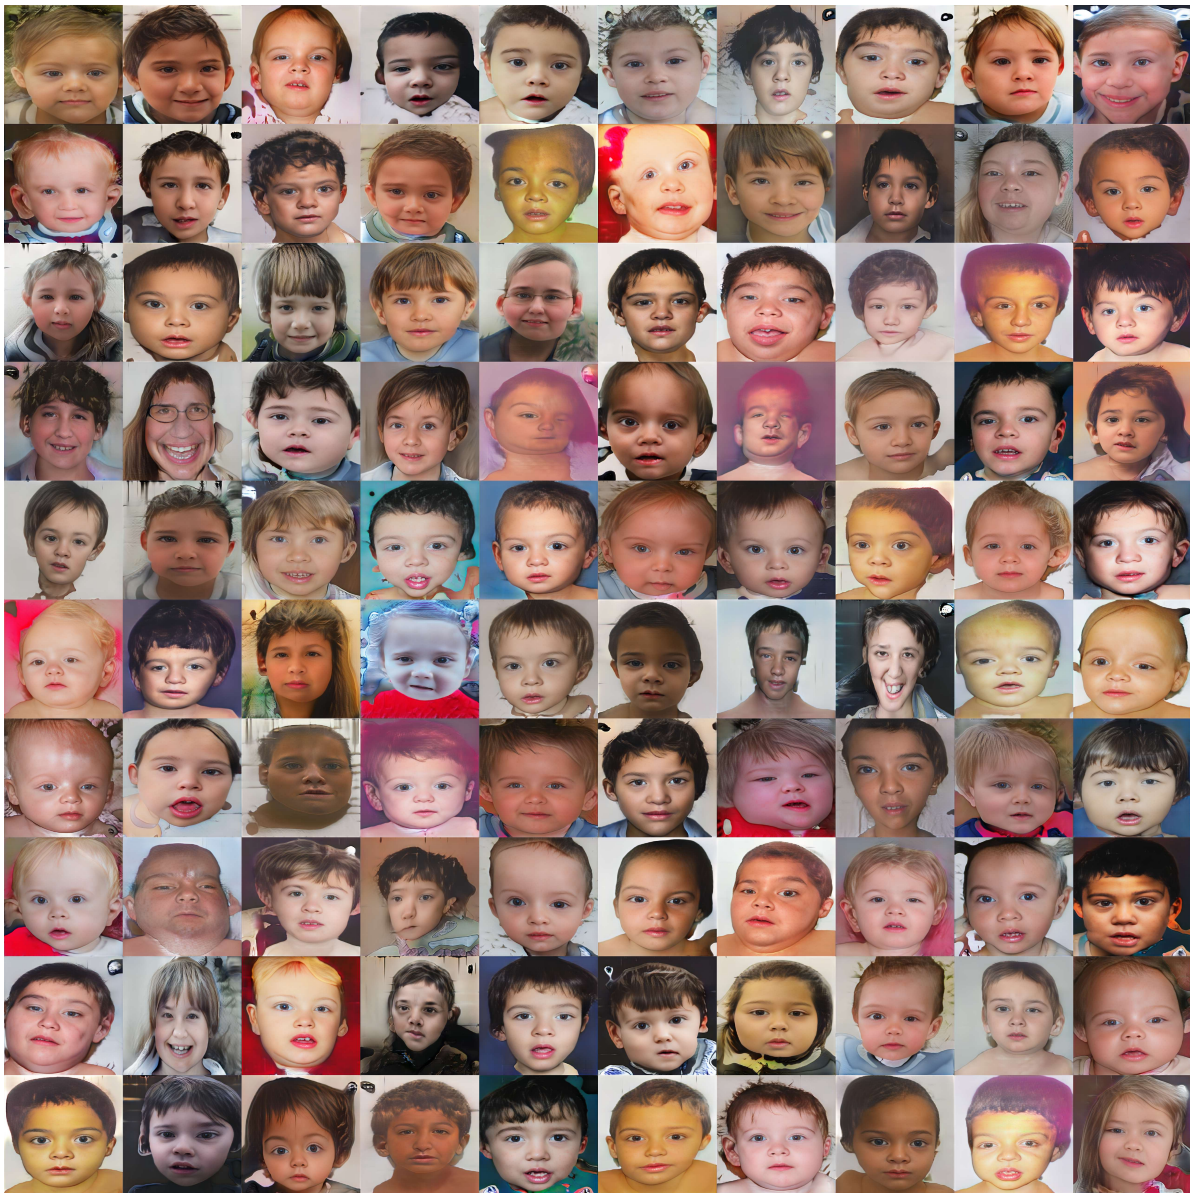

Figure S2. Representative FastGAN images ranked most similar to diseases.

| Disease | Top-1 | Bottom-1 |
|---------|-------|----------|---------|-------|----------|---------|-------|----------|---------|-------|----------|
| AAR     |       |          | AIC     |       |          | MOR     |       |          | MOW     |       |          |
| ALL     |       |          | ALLA    |       |          | OCH     |       |          | OCU     |       |          |
| ALP     |       |          | ALPM    |       |          | ODO     |       |          | POM     |       |          |
| ANG     |       |          | ANK     |       |          | PON     |       |          | PRI     |       |          |
| ART     |       |          | ATA     |       |          | PRO     |       |          | PTEN    |       |          |
| BART    |       |          | BOY     |       |          | PYR     |       |          | SAND    |       |          |
| CAH     |       |          | CAN     |       |          | SIC     |       |          | SPI     |       |          |
| CHU     |       |          | CLE     |       |          | TEMP    |       |          | TUR     |       |          |
| CLOU    |       |          | COD     |       |          | TYR     |       |          |         |       |          |
| CRA     |       |          | CRIS    |       |          |         |       |          |         |       |          |
| CYS     |       |          | DIA     |       |          |         |       |          |         |       |          |
| DOO     |       |          | DOP     |       |          |         |       |          |         |       |          |
| FANC    |       |          | HHH     |       |          |         |       |          |         |       |          |
| IMMU    |       |          | JUV     |       |          |         |       |          |         |       |          |
| KRA     |       |          | LEI     |       |          |         |       |          |         |       |          |
| MAP     |       |          | MARI    |       |          |         |       |          |         |       |          |

Figure S3. **Top-1 and Bottom-1 synthetic images based on similarity to real images.** Top-1 and Bottom-1 denote the most and least similar samples respectively.

## D. Expert and automated evaluation of synthetic data

### D.1. Landmark-based similarity analysis

We conducted our evaluation across all 103 rare disease classes in RDFace. For each class, DreamBooth-generated synthetic images were used, provided they passed quality checks based on facial structure and alignment. Images failing these checks, such as those with low RetinaFace detection confidence or invalid landmark configurations, were excluded at the image level, not the class level. All similarity analyses were performed using normalized  $5 \times 5$  landmark distance matrices computed from RetinaFace keypoints.

#### D.1.1. Heatmap of landmark-based cosine similarities

Figure S4 presents a cosine similarity heatmap comparing the average DreamBooth-generated landmark structure for each class against all real disease class prototypes. The heatmap reveals a strong diagonal trend, reflecting high intra-class similarity, with several classes showing close alignment between synthetic and real facial geometry. However, for certain classes—particularly those with very limited or noisy training data—the diagonal intensity diminishes, indicating lower phenotype fidelity. Off-diagonal activity highlights cross-class resemblance, often reflecting overlapping craniofacial features among syndromes or mode collapse in synthesis.

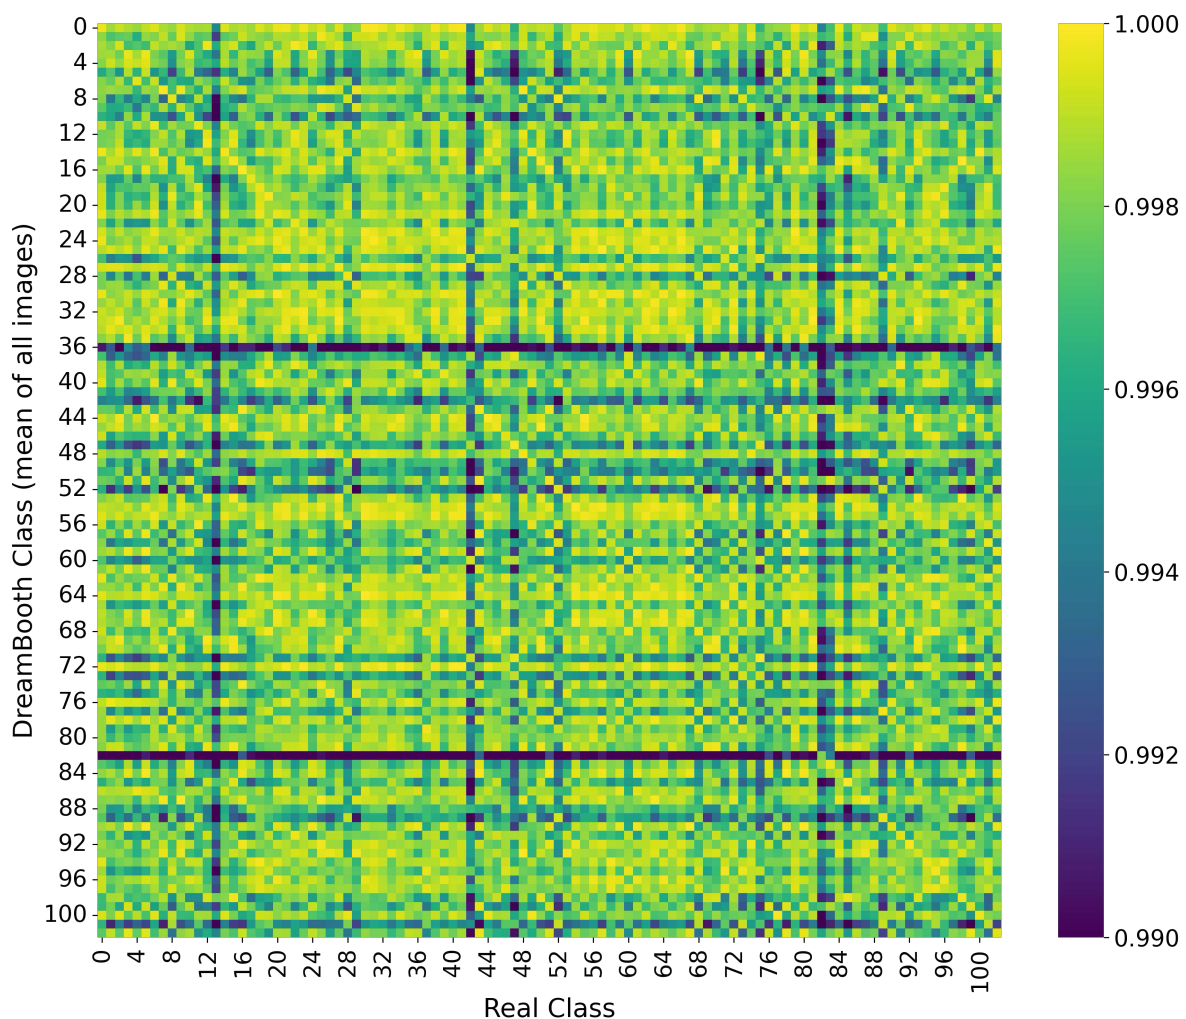

Figure S4. **Cosine similarity heatmap between DreamBooth-generated and real disease prototypes.** The heatmap compares the average landmark distance matrices of DreamBooth-generated images (rows) to those of real disease class prototypes (columns). Brighter values indicate greater similarity.

### D.1.2. Ranking consistency of DreamBooth-generated Images

To quantify how consistently DreamBooth preserves class-specific features, we computed the rank position of the ground-truth class for each synthetic image among all real class prototypes based on cosine similarity. Figure S5 summarizes the average rank per class.

While many classes exhibit ranks close to 1, several fall well below the mean, suggesting inconsistency in capturing distinctive morphology. These cases often correspond to underrepresented or visually subtle conditions in the training set. The overall mean rank across all classes is 19.74, serving as a practical reference for DreamBooth’s phenotype alignment under ultra-low-shot conditions.

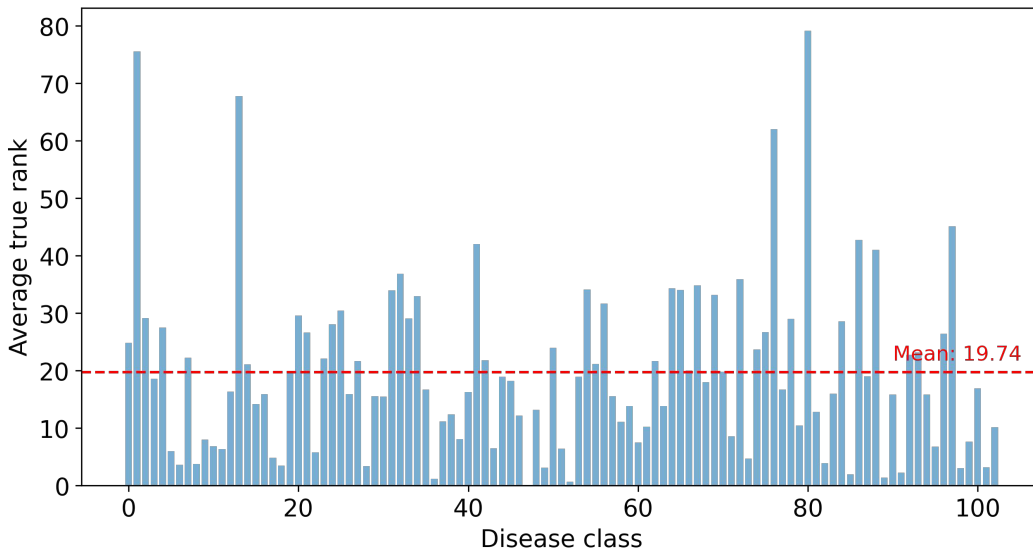

Figure S5. **Average rank of the true disease class for each DreamBooth-generated image.** Each rank is calculated using cosine similarity to the corresponding real class prototype. The red dashed line indicates the overall mean rank.

### D.2. Expert review

In order to evaluate the clinical plausibility of synthetic image-label pairs, we conducted an expert review of 50 DreamBooth and 50 FastGAN samples. Each image was independently assessed by two medical doctor (MD) students (MD1 and MD2) and categorized as *Plausible*, *Implausible*, or *Uncertain*. The results of this expert evaluation are summarized in Table S2.

Table S2. Expert evaluation of the plausibility of synthetic image-label pairs generated by DreamBooth and FastGAN with two MDs.

| Plausibility Rating | DreamBooth |     | FastGAN |     |
|---------------------|------------|-----|---------|-----|
|                     | MD1        | MD2 | MD1     | MD2 |
| Plausible           | 38         | 31  | 14      | 5   |
| Implausible         | 2          | 3   | 15      | 30  |
| Uncertain           | 10         | 16  | 21      | 15  |

To assess the consistency between the two raters, inter-rater reliability was computed for each model, and the pairwise confusion matrices are presented in Table S3. Each cell represents the number of images assigned to a given label combination by the two MD reviewers (*DreamBooth* / *FastGAN*). A strong concentration of counts along the diagonal indicates higher agreement on image plausibility.

Quantitatively, the inter-rater agreement results (Table S4) demonstrate that DreamBooth achieved a substantially higher degree of consensus between raters ( $\kappa = 0.654$ ), corresponding to “substantial agreement” on the Landis–Koch scale, whereas FastGAN showed only minimal agreement ( $\kappa = 0.069$ ). This difference highlights that DreamBooth-generated

Table S3. Expert validation confusion matrices for DreamBooth (DB) and FastGAN (FG). (DB / FG)

| Label              | Plausible | Implausible | Uncertain | Total |
|--------------------|-----------|-------------|-----------|-------|
| <b>Plausible</b>   | 31/2      | 0/0         | 0/3       | 31/5  |
| <b>Implausible</b> | 0/7       | 2/11        | 1/12      | 3/30  |
| <b>Uncertain</b>   | 7/5       | 0/4         | 9/6       | 16/15 |
| <b>Total</b>       | 38/14     | 2/15        | 10/21     | 50/50 |

samples were generally perceived as more clinically plausible and consistent across evaluators, while FastGAN outputs exhibited greater variability and uncertainty.

Table S4. Inter-rater agreement metrics for DreamBooth (DB) and FastGAN (FG).

| Method | Observed Agreement (%) | Cohen’s $\kappa$ | SE    | 95% CI          |
|--------|------------------------|------------------|-------|-----------------|
| DB     | 84.0 (42/50)           | 0.654            | 0.106 | [0.446, 0.862]  |
| FG     | 38.0 (19/50)           | 0.069            | 0.091 | [-0.110, 0.248] |

Overall, the expert review confirms that DreamBooth produces synthetic facial images that retain phenotypic plausibility and diagnostic relevance more consistently than FastGAN, aligning with the quantitative similarity metrics and qualitative visual inspection presented in the main manuscript.

### D.3. Observations and implications

Our evaluation highlights the complementary strengths of automated and expert-based assessments for characterizing the quality of synthetic facial images. Landmark-based similarity analysis reveals that many disease classes exhibit distinct and consistent craniofacial geometry, validating the use of facial landmarks as a phenotypic signature. The observed variability in average rank and cosine similarity across classes reflects sensitivity to both morphological subtlety and the quality of training exemplars. These findings indicate that normalized landmark distance metrics offer an interpretable, spatially grounded method for quantifying phenotype preservation and filtering synthetic samples prior to downstream tasks.

However, structural alignment alone does not guarantee clinical plausibility. To address this, we conducted an expert review to evaluate whether synthetic image-label pairs appeared medically credible. Results show that DreamBooth-generated images were more frequently judged as plausible by at least one medical doctor, whereas FastGAN samples showed higher rates of uncertainty and implausibility. These findings underscore that perceptual realism, which is often emphasized in generative model benchmarks, does not always correlate with diagnostic fidelity. Expert review provides a critical semantic layer that captures domain-specific context often missed by automated metrics.

Together, these results suggest that effective synthetic data curation requires a multi-faceted evaluation strategy that integrates spatial similarity, visual quality, and human judgment. Such approaches are especially important in rare disease settings, where subtle phenotypic cues and label noise can dramatically impact model performance. In future applications, combining interpretable landmark filtering with lightweight expert-in-the-loop review may provide a scalable path for enhancing dataset quality and clinical utility.

## E. Tradeoff between disease-specific structure and visual realism

To assess the quality and disease-relevance of generated synthetic images, we evaluate two image-level realism metrics: RetinaFace detection confidence and LPIPS perceptual similarity. These metrics are computed across Top- $n$  subsets (ranging from 1000 to 6000 images), where the images are ranked by their landmark-based cosine similarity to real disease class prototypes.

**DreamBooth** Figure S6 shows the trend of RetinaFace and LPIPS scores across Top- $n$  DreamBooth subsets. As  $n$  increases, RetinaFace confidence scores gradually decline, suggesting reduced alignment and detectability in lower-ranked images. Meanwhile, LPIPS scores increase, indicating a decrease in perceptual similarity to real images. These opposing trends reflect a trade-off between structural fidelity (as captured by landmarks) and low-level texture realism. The landmark-based ranking effectively promotes DreamBooth samples with coherent facial geometry and higher visual plausibility.

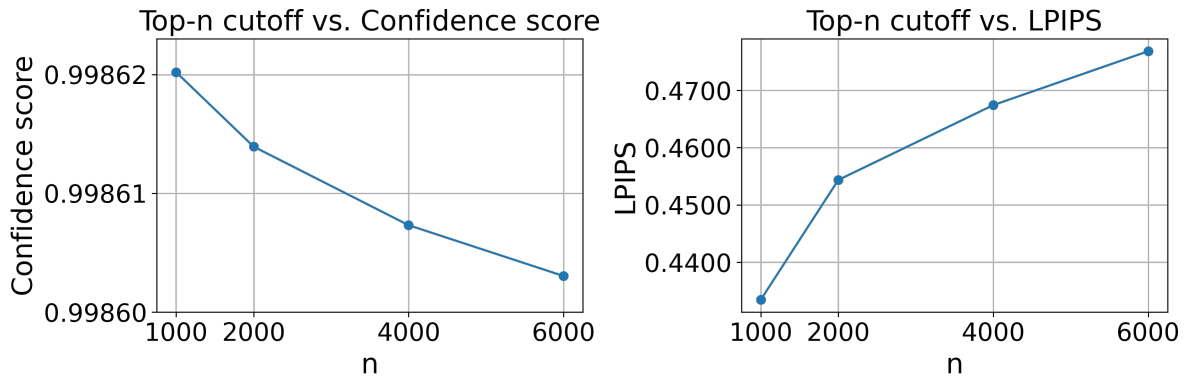

Figure S6. **DreamBooth – Correlation Between Top- $n$  Ranking and Visual Realism.** RetinaFace detection confidence (left) and LPIPS similarity (right) across Top- $n$  ranked DreamBooth images.

**FastGAN** FastGAN samples exhibit a broadly similar trend to DreamBooth in terms of ranking-based visual quality (see Figure S7). As the Top- $n$  threshold increases, RetinaFace confidence scores slightly decline and LPIPS scores gradually increase, indicating reduced structural detectability and perceptual similarity at lower-ranked positions. However, some local fluctuations are observed—particularly around the Top-2000 cutoff—where both metrics deviate slightly from the overall trajectory. These irregularities suggest that landmark-based ranking is still somewhat effective for FastGAN, but may be less stable than for DreamBooth due to the lack of class-specific conditioning.

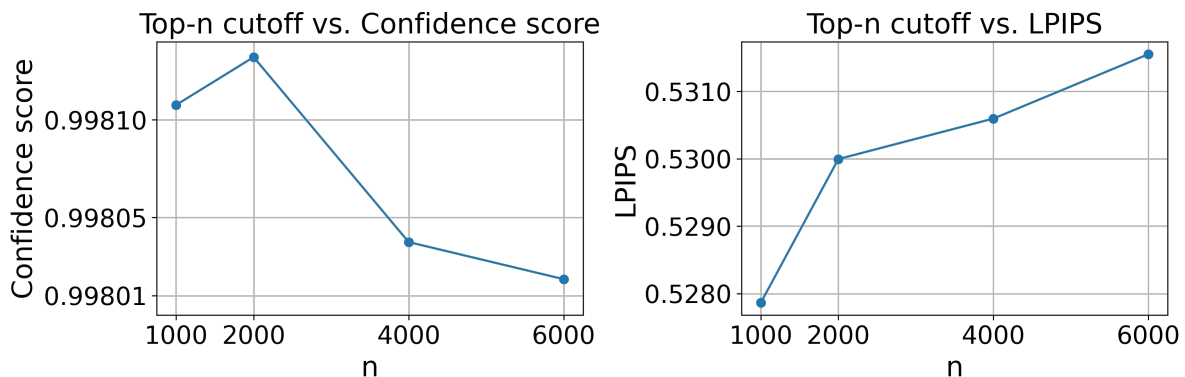

Figure S7. **FastGAN – Correlation Between Top- $n$  Ranking and Visual Realism.** RetinaFace detection confidence (left) and LPIPS similarity (right) across Top- $n$  ranked FastGAN images.

## F. Synthetic data-involved downstream tasks results

### F.1. Standard supervised classification and synthetic scaling effect

Table S5 and Table S6 below report Top- $k$  classification accuracies across various backbones. Each row represents classification performance (Top- $k$  accuracy) under a different training configuration. “Real only” refers to models trained exclusively on real RDFace data. “Top- $n$ ” rows correspond to training sets augmented with the Top- $n$  synthetic images selected based on landmark similarity to real samples. The synthetic images are chosen to best align with phenotype-specific facial structure.

Table S5. Top- $k$  accuracies (%) across backbones and synthetic cutoffs of DreamBooth samples.

| ACC (%) | Top- $n$  | ResNet       | DenseNet            | FaceNet      | VGG          | Swin-T              | CLIP         |
|---------|-----------|--------------|---------------------|--------------|--------------|---------------------|--------------|
| Top-1   | Real only | 6.90 (1.45)  | <b>15.93 (2.34)</b> | 9.91 (1.81)  | 11.68 (1.58) | 14.34 (2.61)        | 3.1 (1.48)   |
|         | Top-1000  | 12.21 (1.70) | <b>17.52 (2.29)</b> | 15.04 (2.87) | 16.64 (4.07) | 16.81 (1.40)        | 9.03 (2.29)  |
|         | Top-2000  | 12.57 (2.61) | <b>20.35 (1.40)</b> | 14.51 (1.34) | 14.69 (1.61) | 18.76 (2.20)        | 15.22 (4.35) |
|         | Top-4000  | 13.27 (2.26) | <b>19.65 (0.74)</b> | 16.46 (1.01) | 17.35 (4.18) | 18.76 (2.29)        | 16.81 (1.25) |
|         | Top-6000  | 13.63 (1.61) | <b>21.06 (2.53)</b> | 16.28 (2.91) | 16.64 (2.61) | 18.94 (2.70)        | 15.75 (2.58) |
| Top-5   | Real only | 18.58 (3.00) | <b>33.63 (3.70)</b> | 24.60 (5.43) | 29.91 (2.68) | 26.19 (2.68)        | 12.74 (2.84) |
|         | Top-1000  | 27.26 (3.39) | <b>35.58 (3.39)</b> | 32.04 (1.92) | 29.91 (1.45) | 33.81 (2.29)        | 17.52 (4.26) |
|         | Top-2000  | 30.09 (1.98) | <b>37.35 (2.37)</b> | 33.63 (2.65) | 33.10 (3.99) | 36.81 (3.40)        | 25.13 (2.70) |
|         | Top-4000  | 30.09 (4.29) | <b>40.35 (4.08)</b> | 33.98 (2.97) | 34.16 (2.84) | 35.40 (4.15)        | 28.14 (0.97) |
|         | Top-6000  | 33.45 (4.70) | <b>39.65 (2.29)</b> | 32.74 (1.77) | 33.81 (1.58) | 36.46 (3.78)        | 29.38 (2.45) |
| Top-10  | Real only | 28.50 (3.67) | <b>43.01 (2.63)</b> | 34.87 (4.75) | 38.41 (1.34) | 35.93 (3.17)        | 19.12 (5.18) |
|         | Top-1000  | 38.41 (3.94) | <b>47.61 (3.30)</b> | 44.25 (2.94) | 39.82 (1.77) | 46.19 (3.03)        | 26.02 (2.55) |
|         | Top-2000  | 41.59 (5.16) | <b>47.26 (2.13)</b> | 43.89 (2.55) | 43.01 (1.34) | 46.02 (1.08)        | 33.98 (2.25) |
|         | Top-4000  | 40.53 (3.45) | <b>51.33 (3.00)</b> | 43.72 (2.70) | 44.25 (3.00) | 46.19 (1.58)        | 34.87 (1.61) |
|         | Top-6000  | 42.65 (2.68) | <b>49.20 (1.48)</b> | 43.89 (2.47) | 46.73 (1.15) | 48.67 (2.26)        | 37.70 (2.03) |
| Top-30  | Real only | 54.34 (2.39) | <b>64.42 (1.92)</b> | 58.23 (5.06) | 60.88 (2.02) | 58.41 (3.81)        | 42.30 (4.40) |
|         | Top-1000  | 62.30 (2.22) | <b>70.62 (3.03)</b> | 64.07 (3.99) | 63.01 (2.83) | <b>70.62 (2.20)</b> | 49.56 (2.65) |
|         | Top-2000  | 62.12 (3.15) | <b>70.62 (3.39)</b> | 64.60 (3.59) | 66.73 (3.99) | 69.56 (2.70)        | 57.17 (4.18) |
|         | Top-4000  | 63.36 (2.91) | 70.09 (1.48)        | 67.96 (1.58) | 64.42 (2.37) | <b>70.80 (1.08)</b> | 57.35 (2.02) |
|         | Top-6000  | 63.19 (3.94) | <b>68.67 (3.23)</b> | 63.01 (2.89) | 66.37 (2.58) | 68.50 (2.39)        | 61.24 (3.05) |

Table S6. Top- $k$  accuracies (%) across backbones and synthetic cutoffs of FastGAN samples.

| ACC (%) | Top- $n$  | ResNet       | DenseNet            | FaceNet      | VGG                 | Swin-T              | CLIP         |
|---------|-----------|--------------|---------------------|--------------|---------------------|---------------------|--------------|
| Top-1   | Real only | 6.90 (1.45)  | <b>15.93 (2.34)</b> | 9.91 (1.81)  | 11.68 (1.58)        | 14.34 (2.61)        | 3.1 (1.48)   |
|         | Top-1000  | 8.50 (1.48)  | <b>13.27 (3.13)</b> | 6.55 (2.84)  | 7.26 (2.37)         | 10.44 (1.70)        | 1.42 (1.34)  |
|         | Top-2000  | 6.55 (2.13)  | <b>10.44 (0.40)</b> | 5.13 (0.74)  | 6.37 (3.67)         | 8.50 (2.63)         | 1.06 (1.15)  |
|         | Top-4000  | 4.07 (1.48)  | 8.14 (1.45)         | 4.96 (1.19)  | 7.96 (2.26)         | <b>9.73 (1.40)</b>  | 0.71 (0.74)  |
|         | Top-6000  | 4.78 (0.79)  | <b>9.73 (2.08)</b>  | 4.78 (1.34)  | 5.49 (2.61)         | 9.20 (1.84)         | 1.42 (1.01)  |
| Top-5   | Real only | 18.58 (3.00) | <b>33.63 (3.70)</b> | 24.60 (5.43) | 29.91 (2.68)        | 26.19 (2.68)        | 12.74 (2.84) |
|         | Top-1000  | 20.71 (1.34) | <b>27.79 (1.34)</b> | 18.05 (2.97) | 18.94 (3.40)        | 25.66 (1.88)        | 5.49 (2.37)  |
|         | Top-2000  | 19.12 (2.31) | 23.54 (2.22)        | 18.05 (1.73) | 18.76 (2.89)        | <b>25.49 (4.03)</b> | 6.90 (2.76)  |
|         | Top-4000  | 17.17 (2.31) | 25.49 (2.89)        | 16.81 (1.25) | 20.71 (2.04)        | <b>26.19 (3.57)</b> | 5.49 (1.70)  |
|         | Top-6000  | 18.58 (1.98) | <b>25.49 (2.02)</b> | 15.58 (1.94) | 21.95 (0.97)        | 23.89 (4.42)        | 6.19 (1.08)  |
| Top-10  | Real only | 28.50 (3.67) | <b>43.01 (2.63)</b> | 34.87 (4.75) | 38.41 (1.34)        | 35.93 (3.17)        | 19.12 (5.18) |
|         | Top-1000  | 29.20 (3.59) | <b>37.70 (3.29)</b> | 30.27 (3.51) | 29.03 (5.92)        | 36.64 (2.22)        | 11.15 (1.48) |
|         | Top-2000  | 28.67 (4.18) | 34.34 (0.74)        | 28.85 (3.79) | 29.38 (2.20)        | <b>35.58 (3.51)</b> | 11.68 (2.20) |
|         | Top-4000  | 29.03 (2.68) | 35.93 (3.04)        | 28.32 (2.50) | 31.33 (4.23)        | <b>36.64 (4.58)</b> | 11.15 (2.77) |
|         | Top-6000  | 31.15 (3.15) | <b>35.93 (3.10)</b> | 24.07 (2.29) | 32.39 (2.97)        | 33.45 (3.62)        | 13.63 (0.79) |
| Top-30  | Real only | 54.34 (2.39) | <b>64.42 (1.92)</b> | 58.23 (5.06) | 60.88 (2.02)        | 58.41 (3.81)        | 42.30 (4.40) |
|         | Top-1000  | 51.68 (2.04) | <b>61.59 (5.82)</b> | 57.52 (0.63) | 55.22 (5.07)        | 60.35 (1.92)        | 34.51 (2.73) |
|         | Top-2000  | 53.10 (3.54) | 58.41 (2.08)        | 55.04 (4.44) | 53.27 (3.33)        | <b>61.77 (4.90)</b> | 32.39 (2.13) |
|         | Top-4000  | 56.46 (3.51) | <b>60.00 (3.15)</b> | 55.58 (1.70) | 59.12 (4.12)        | 57.88 (3.40)        | 32.57 (2.46) |
|         | Top-6000  | 55.75 (3.19) | 54.34 (3.68)        | 55.40 (2.31) | <b>60.71 (1.94)</b> | 56.46 (1.15)        | 38.23 (5.78) |

**Synthetic scaling effect** The relationship between real-only and synthetic-augmented performance across Top- $k$  settings and Top- $n$  synthetic cutoffs is shown in Figure S8 and Figure S9. These plots visualize the downstream classification accuracies using DreamBooth and FastGAN generated samples, respectively, across six backbone models.

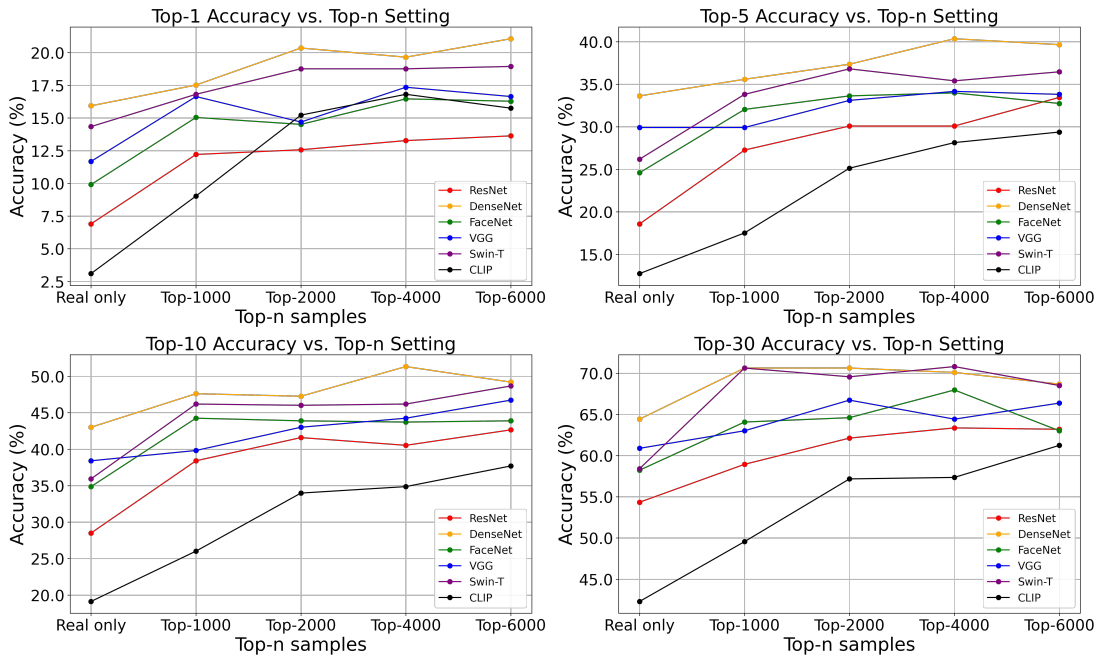

Figure S8. **Top- $k$  accuracy comparison using DreamBooth-generated data.** Each subplot shows Top-1, Top-5, Top-10, and Top-30 accuracy across synthetic cutoffs for six backbone models. DreamBooth augmentation improves performance across most settings.

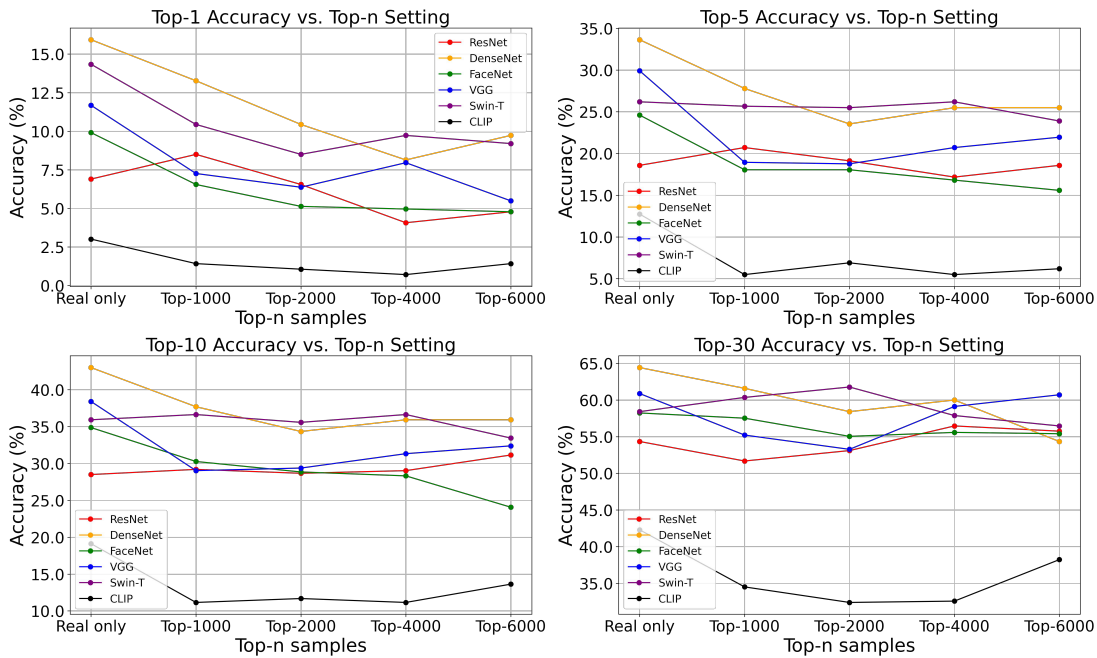

Figure S9. **Top- $k$  accuracy comparison using FastGAN-generated data.** Each subplot shows Top-1, Top-5, Top-10, and Top-30 accuracy across synthetic cutoffs for six backbone models. Compared to DreamBooth, FastGAN augmentation results in less consistent or degraded performance across most settings.

## F.2. Few-shot learning

Based on prior results, we focus our few-shot learning analysis on DreamBooth-augmented data. This choice is motivated by the consistent advantages of DreamBooth samples over FastGAN in terms of semantic fidelity, preservation of disease-relevant facial traits, and interpretability. These properties are especially important in ultra-low-shot settings, where maximizing the realism and diagnostic relevance of synthetic data is critical for generalization. Table S7 summarizes performance across multiple backbones under synthetic data augmentation. Each pair of rows shares the same pretrained backbone, where the first row (e.g., ResNet) uses only real training data, and the second row (e.g., ResNet (dream)) incorporates DreamBooth-generated synthetic images for data augmentation.

Table S7. Few-shot classification accuracies (%) under 5-way, 10-way, and 15-way settings with 1-shot and 5-shot support and query sets.

| ACC (%)          | 5-way               |              | 10-way              |              | 15-way              |              |
|------------------|---------------------|--------------|---------------------|--------------|---------------------|--------------|
|                  | 1-shot              | 5-shot       | 1-shot              | 5-shot       | 1-shot              | 5-shot       |
| ResNet           | 24.18 (2.56)        | –            | 18.15 (2.58)        | –            | 17.99 (1.26)        | –            |
| ResNet (dream)   | <b>25.72 (1.62)</b> | 33.62 (1.91) | <b>22.21 (2.60)</b> | 22.63 (2.11) | <b>18.22 (1.91)</b> | 20.04 (2.77) |
| DenseNet         | 26.20 (2.01)        | –            | 17.36 (1.66)        | –            | <b>17.30 (3.45)</b> | –            |
| DenseNet (dream) | <b>29.88 (1.51)</b> | 33.40 (2.02) | <b>19.79 (3.19)</b> | 24.43 (3.82) | 16.06 (2.77)        | 18.35 (2.24) |
| FaceNet          | <b>25.16 (4.89)</b> | –            | 12.93 (2.33)        | –            | 8.03 (1.40)         | –            |
| FaceNet (dream)  | 23.60 (4.06)        | 28.30 (2.92) | <b>13.17 (2.33)</b> | 17.31 (3.47) | <b>9.07 (1.44)</b>  | 12.17 (1.24) |
| VGG              | <b>21.54 (3.72)</b> | –            | 10.82 (2.14)        | –            | 9.05 (2.20)         | –            |
| VGG (dream)      | 21.02 (5.85)        | 26.76 (3.42) | <b>13.67 (2.08)</b> | 13.68 (1.94) | <b>9.59 (1.48)</b>  | 11.20 (1.59) |
| Swin-T           | 22.24 (2.88)        | –            | 10.94 (2.69)        | –            | 8.03 (2.41)         | –            |
| Swin-T (dream)   | <b>26.72 (4.34)</b> | 25.78 (4.91) | <b>13.30 (1.56)</b> | 13.43 (1.94) | <b>9.57 (2.57)</b>  | 8.82 (0.97)  |
| CLIP             | <b>23.48 (5.28)</b> | –            | <b>12.33 (1.96)</b> | –            | 7.30 (1.90)         | –            |
| CLIP (dream)     | 22.30 (2.63)        | 24.80 (3.48) | 12.14 (1.98)        | 13.04 (2.08) | <b>8.66 (2.82)</b>  | 8.11 (1.32)  |

## F.3. Observations

**Standard supervised classification** The results in Table S5 and Table S6 highlight a clear distinction in the effectiveness of different generative models for data augmentation in classifications. DreamBooth consistently enhances model performance across Top- $k$  accuracies and Top- $n$  settings, demonstrating its ability to produce high-quality, semantically aligned images that support generalization. In contrast, FastGAN shows less consistent gains and, in some cases, degrades performance as more synthetic data is added—indicating a lower signal-to-noise ratio in the generated samples. These findings underscore the importance of not only using synthetic data, but selecting the right generation method.

**Few-shot learning** Table S7 further illustrates how the utility of synthetic augmentation depends on the interaction between model architecture and data quality. While DreamBooth-generated samples consistently improve performance, gains vary across backbones, with CNNs such as DenseNet and ResNet benefiting more than transformer-based models like Swin Transformer or CLIP. Additionally, the performance gap between 1-shot and 5-shot conditions emphasizes the value of even modest increases in labeled support. These results suggest that few-shot learning with synthetic data is most effective when both model and augmentation strategy are jointly optimized for the task.

Overall, high semantic fidelity, structural consistency, and disease-relevant visual features appear essential for synthetic augmentation to benefit rare disease classification, especially in ultra-low-shot regimes.

## G. VLM-based report generation

### G.1. Prompt design

To ensure consistency and clinical interpretability of the generated phenotype reports, we designed a structured prompt tailored to the rare disease diagnosis task. The prompt guides the multimodal vision language model (VLM) to assume the role of a professional clinical geneticist and produce structured, concise diagnostic reports based on input facial images. The prompt emphasizes anatomical coverage, medical reasoning, and alignment with the supervised landmark annotations used in other parts of our study. A prompt template is shown in Figure S10.

You are a professional clinical geneticist. Given the facial image, generate a concise diagnostic report focusing on facial features.

**\*\*Instructions:\*\***

- Begin with an overall impression paragraph summarizing the patient's facial appearance.
- Then, for each facial region, write a single paragraph to describe the facial features.
- Finish with a prediction of potential disease and a diagnostic suggestion or next steps.

**\*\*Facial Diagnostic Report:\*\***

Overall Impression:  
Left Eye:  
Right Eye:  
Nose:  
Mouth/Lips:  
Diagnostic Suggestion:

Figure S10. Prompt template for VLM-based report generation.

### G.2. Report evaluation

To evaluate the semantic consistency of synthetic facial images, we used a multimodal large language model (VLM) to generate structured phenotype reports for real and DreamBooth-generated images. This analysis assesses whether synthetic faces reflect clinically meaningful traits of their target disease class. We excluded FastGAN images, as they are generated unconditionally and lack one-to-one correspondence with real patients. Since the VLM-based evaluation depends on matched image pairs for assessing regional semantic consistency, it is not applicable to class-agnostic generative models.

To illustrate this evaluation process, we present selected examples spanning high and low semantic similarity scores. For each example, we compare the phenotype reports generated from a real image and a DreamBooth-generated synthetic image of the same disease class. Region-level descriptions are extracted from both reports. Matching phenotype terms are highlighted in green, while contradictory or inconsistent terms are shown in red. The examples cover a range of semantic similarity levels, allowing qualitative inspection of both faithful and divergent generations. Detailed comparisons are shown in Figure S11, S12, S13, and S14.

| Rare Disease Facial Image Report                                                                                                                                                                                                                                                                                                                                                                                                                                                                                                                                                                                                                                                                                                                                                                                                                                                                                                                                                                                                                                                                                                 | Synthetic Image Report                                                                                                                                                                                                                                                                                                                                                                                                                                                                                                                                                                                                                                                                                                                                                                                                                                                                                                                                                                                                                                                                                                                                                                                                                                                                                                                                                       |
|----------------------------------------------------------------------------------------------------------------------------------------------------------------------------------------------------------------------------------------------------------------------------------------------------------------------------------------------------------------------------------------------------------------------------------------------------------------------------------------------------------------------------------------------------------------------------------------------------------------------------------------------------------------------------------------------------------------------------------------------------------------------------------------------------------------------------------------------------------------------------------------------------------------------------------------------------------------------------------------------------------------------------------------------------------------------------------------------------------------------------------|------------------------------------------------------------------------------------------------------------------------------------------------------------------------------------------------------------------------------------------------------------------------------------------------------------------------------------------------------------------------------------------------------------------------------------------------------------------------------------------------------------------------------------------------------------------------------------------------------------------------------------------------------------------------------------------------------------------------------------------------------------------------------------------------------------------------------------------------------------------------------------------------------------------------------------------------------------------------------------------------------------------------------------------------------------------------------------------------------------------------------------------------------------------------------------------------------------------------------------------------------------------------------------------------------------------------------------------------------------------------------|
| <p><b>Overall Impression:</b> The patient exhibits a distinctive facial appearance characterized by a <b>broad forehead</b>, <b>prominent nasal bridge</b>, and a relatively flat midface. The eyes appear to be set apart, and there is a noticeable lack of upper eyelid fold. The nose is wide with a broad base, and the mouth appears to be slightly open.</p> <p><b>Left Eye:</b> The left eye appears to have a <b>mild ptosis (drooping)</b> and a lack of upper eyelid fold.</p> <p><b>Right Eye:</b> The right eye also shows signs of ptosis and a lack of upper eyelid fold, similar to the left eye.</p> <p><b>Nose:</b> <b>The nose is broad</b> with a wide base and a relatively <b>prominent nasal bridge</b>.</p> <p><b>Mouth/Lips:</b> <b>The mouth is slightly open</b>, and the lips appear thin.</p> <p><b>Diagnostic Suggestion:</b> The patient's facial features—broad forehead, wide nose, and dental abnormalities—suggest Apert syndrome, a rare genetic disorder caused by FGFR2 mutations. Genetic testing and a multidisciplinary evaluation are recommended for confirmation and management.</p> | <p><b>Overall Impression:</b> The patient exhibits a distinctive facial appearance characterized by a <b>broad forehead</b>, <b>prominent nasal bridge</b>, and a slightly upturned mouth. The cheeks appear full, and there is a noticeable asymmetry in the facial structure.</p> <p><b>Left Eye:</b> The left eye appears slightly smaller than the right eye, with a <b>mild ptosis (drooping)</b> noted. The eyelid margin is smooth, and there is no obvious epicanthal fold.</p> <p><b>Right Eye:</b> The right eye is larger and more prominent compared to the left. The eyelid margin is smooth.</p> <p><b>Nose:</b> <b>The nose is broad</b> with a <b>prominent nasal bridge</b>. The tip of the nose is slightly upturned, and there is a mild deviation to the right side.</p> <p><b>Mouth/Lips:</b> <b>The mouth is slightly open</b>, revealing a full set of teeth. The lips are full, and the corners of the mouth are turned upwards. There is a slight asymmetry in the mouth opening, with the left side appearing slightly wider.</p> <p><b>Diagnostic Suggestion:</b> The patient's facial features—broad face, upturned mouth, and small nose—are suggestive of Down syndrome; genetic testing (e.g., karyotype or aCGH) and a comprehensive evaluation by a pediatrician or geneticist are recommended for confirmation and further assessment.</p> |

Figure S11. **High-Similarity Case.** The real and synthetic reports both describe ptosis, a broad nose, and slightly open mouth appearance. Minor deviations in phrasing are present, but the overall diagnostic impression remains aligned.

| Rare Disease Facial Image Report                                                                                                                                                                                                                                                                                                                                                                                                                                                                                                                                                                                                                                                                                                                                                                                                                                                                                                                                                                                                                                                                                                                                            | Synthetic Image Report                                                                                                                                                                                                                                                                                                                                                                                                                                                                                                                                                                                                                                                                                                                                                                                                                                                                                                                                                                                                                                                                                                                                                                                                                                                                                |
|-----------------------------------------------------------------------------------------------------------------------------------------------------------------------------------------------------------------------------------------------------------------------------------------------------------------------------------------------------------------------------------------------------------------------------------------------------------------------------------------------------------------------------------------------------------------------------------------------------------------------------------------------------------------------------------------------------------------------------------------------------------------------------------------------------------------------------------------------------------------------------------------------------------------------------------------------------------------------------------------------------------------------------------------------------------------------------------------------------------------------------------------------------------------------------|-------------------------------------------------------------------------------------------------------------------------------------------------------------------------------------------------------------------------------------------------------------------------------------------------------------------------------------------------------------------------------------------------------------------------------------------------------------------------------------------------------------------------------------------------------------------------------------------------------------------------------------------------------------------------------------------------------------------------------------------------------------------------------------------------------------------------------------------------------------------------------------------------------------------------------------------------------------------------------------------------------------------------------------------------------------------------------------------------------------------------------------------------------------------------------------------------------------------------------------------------------------------------------------------------------|
| <p><b>Overall Impression:</b> The patient exhibits a distinctive facial appearance characterized by micrognathia, prominent nasal bridge, and a relatively flat midface. The eyes appear to be widely spaced, and there is a noticeable lack of fullness in the cheeks and temples.</p> <p><b>Left Eye:</b> The left eye appears to have a mild degree of exophthalmos and may show some ptosis. The palpebral fissure seems slightly narrow.</p> <p><b>Right Eye:</b> The right eye also shows signs of exophthalmos and ptosis. The palpebral fissure appears similarly narrow as the left eye.</p> <p><b>Nose:</b> The nose is broad and flat, with a wide nasal bridge. There is a slight upturning at the nasolabial folds.</p> <p><b>Mouth/Lips:</b> The mouth appears small and slightly downturned. The lips are thin, and there is a noticeable lack of fullness in the upper lip.</p> <p><b>Diagnostic Suggestion:</b> The patient's facial features are suggestive of Treacher Collins syndrome; genetic counseling, confirmatory genetic testing, and evaluation by a pediatrician or craniofacial specialist are recommended for diagnosis and management.</p> | <p><b>Overall Impression:</b> The patient exhibits a prominent midface hypoplasia, a wide nasal bridge, and a large, open mouth. The eyes appear to be partially closed, and there is noticeable asymmetry in the facial structures.</p> <p><b>Left Eye:</b> The left eye appears to have a mild ptosis and a slightly smaller palpebral fissure compared to the right eye.</p> <p><b>Right Eye:</b> The right eye also shows signs of ptosis and a smaller palpebral fissure. The eyelid margin appears to be slightly irregular.</p> <p><b>Nose:</b> The nose is broad and flat, with a wide nasal bridge. The philtrum appears to be short, and the nostrils seem to be flared.</p> <p><b>Mouth/Lips:</b> The mouth is widely open, revealing a large tongue and a high arched palate. The lips appear thin, and there is a cleft lip deformity on the left side, extending from the upper lip into the alveolar ridge.</p> <p><b>Diagnostic Suggestion:</b> The patient's facial features may indicate a syndrome such as Pierre-Robin Sequence or Treacher Collins Syndrome; a multidisciplinary evaluation involving a pediatrician, geneticist, orthodontist, and craniofacial specialist is recommended for diagnosis and management planning, along with genetic counseling and testing.</p> |

Figure S12. **High-Similarity Case.** Side-by-side comparison of phenotype reports from a real and synthetic image of the same disease class. The synthetic report closely mirrors the real one, especially in descriptions of palpebral fissures, ptosis, nasal shape, and lip structure.

| Rare Disease Facial Image Report                                                                                                                                                                                                                                                                                                                                                                                                                                                                                                                                                                                                                                                                                                                                                                                                                                                                                                                                                                                                    | Synthetic Image Report                                                                                                                                                                                                                                                                                                                                                                                                                                                                                                                                                                                                                                                                                                                                                                                                                                                                                                                                                                                                                                                                                                                         |
|-------------------------------------------------------------------------------------------------------------------------------------------------------------------------------------------------------------------------------------------------------------------------------------------------------------------------------------------------------------------------------------------------------------------------------------------------------------------------------------------------------------------------------------------------------------------------------------------------------------------------------------------------------------------------------------------------------------------------------------------------------------------------------------------------------------------------------------------------------------------------------------------------------------------------------------------------------------------------------------------------------------------------------------|------------------------------------------------------------------------------------------------------------------------------------------------------------------------------------------------------------------------------------------------------------------------------------------------------------------------------------------------------------------------------------------------------------------------------------------------------------------------------------------------------------------------------------------------------------------------------------------------------------------------------------------------------------------------------------------------------------------------------------------------------------------------------------------------------------------------------------------------------------------------------------------------------------------------------------------------------------------------------------------------------------------------------------------------------------------------------------------------------------------------------------------------|
| <p><b>Overall Impression:</b> The patient exhibits a distinctive facial appearance characterized by prominent epicanthic folds, a broad nasal bridge, a flat nasal tip, and a slightly upturned mouth. The eyes appear to be set apart, and there is a noticeable lack of fullness in the cheeks.</p> <p><b>Left Eye:</b> The left eye shows a mild degree of epicanthic fold. The eye appears to have a normal position and size.</p> <p><b>Right Eye:</b> The right eye also demonstrates a mild epicanthic fold, similar to the left eye. The eye position and size appear normal as well.</p> <p><b>Nose:</b> The nose has a broad nasal bridge and a flattened nasal tip.</p> <p><b>Mouth/Lips:</b> The mouth appears slightly upturned.</p> <p><b>Diagnostic Suggestion:</b> The patient's facial features—broad nasal bridge, flattened nasal tip, and upturned mouth—suggest a possible genetic syndrome; referral to a pediatric geneticist for comprehensive evaluation and potential genetic testing is recommended.</p> | <p><b>Overall Impression:</b> The patient exhibits a distinctive facial appearance characterized by prominent epicanthic folds, a broad nasal bridge, and a slightly upturned nose.</p> <p><b>Left Eye:</b> The left eye is slightly smaller than the right, with a mild degree of epicanthic fold. The palpebral fissure appears somewhat narrow, contributing to the overall impression of a "downslanted" eye.</p> <p><b>Right Eye:</b> The right eye also shows a mild epicanthic fold, similar to the left, but less pronounced. The palpebral fissure is slightly wider compared to the left eye.</p> <p><b>Nose:</b> The nose is broad with a slightly upturned tip.</p> <p><b>Mouth/Lips:</b> The mouth is full with a wide smile, and the lips appear full and slightly downturned at the corners.</p> <p><b>Diagnostic Suggestion:</b> The patient's facial features—epicanthic folds, broad nasal bridge, and full mouth—are highly suggestive of Down syndrome; a comprehensive genetic evaluation, including karyotype and possibly microarray testing, is recommended to confirm the diagnosis and guide further management.</p> |

Figure S13. **Mixed-Agreement Case.** Although there is some alignment in features like nasal shape and bridge width, the synthetic report diverges in descriptors of lip configuration and diagnostic suggestion, showing partial inconsistency.

| Rare Disease Facial Image Report                                                                                                                                                                                                                                                                                                                                                                                                                                                                                                                                                                                                                                                                                                                                                                                                                                                                                                                                                                                                                                                                                                                                                                        | Synthetic Image Report                                                                                                                                                                                                                                                                                                                                                                                                                                                                                                                                                                                                                                                                                                                                                                                                                                                                                                                                                                                                                                                                                                                                                                                                                                                                                                                                                                                                                                                                                                                                                                                                                         |
|---------------------------------------------------------------------------------------------------------------------------------------------------------------------------------------------------------------------------------------------------------------------------------------------------------------------------------------------------------------------------------------------------------------------------------------------------------------------------------------------------------------------------------------------------------------------------------------------------------------------------------------------------------------------------------------------------------------------------------------------------------------------------------------------------------------------------------------------------------------------------------------------------------------------------------------------------------------------------------------------------------------------------------------------------------------------------------------------------------------------------------------------------------------------------------------------------------|------------------------------------------------------------------------------------------------------------------------------------------------------------------------------------------------------------------------------------------------------------------------------------------------------------------------------------------------------------------------------------------------------------------------------------------------------------------------------------------------------------------------------------------------------------------------------------------------------------------------------------------------------------------------------------------------------------------------------------------------------------------------------------------------------------------------------------------------------------------------------------------------------------------------------------------------------------------------------------------------------------------------------------------------------------------------------------------------------------------------------------------------------------------------------------------------------------------------------------------------------------------------------------------------------------------------------------------------------------------------------------------------------------------------------------------------------------------------------------------------------------------------------------------------------------------------------------------------------------------------------------------------|
| <p><b>Overall Impression:</b> The patient presents with a symmetrical face with no obvious abnormalities in the overall facial structure. The skin appears smooth without any visible lesions or discolorations. The eyes, nose, mouth and lips appear proportionate and within normal limits.</p> <p><b>Left Eye:</b> The left eye appears slightly smaller than the right eye. There is no evidence of ptosis, exophthalmos, or other ocular abnormalities.</p> <p><b>Right Eye:</b> There is no evidence of ptosis, exophthalmos, or other ocular abnormalities.</p> <p><b>Nose:</b> The nose appears proportionate with no deviation or asymmetry. The nasal bridge is straight, and there are no signs of other nasal abnormalities.</p> <p><b>Mouth/Lips:</b> The mouth is closed, and the lips appear symmetrical.</p> <p><b>Diagnostic Suggestion:</b> Mild asymmetry in eye size without other prominent facial anomalies makes diagnosis challenging, but features may suggest Marfan syndrome; referral to a pediatrician or geneticist for comprehensive evaluation, detailed history, physical exam, and possible genetic testing is recommended to confirm or rule out the condition.</p> | <p><b>Overall Impression:</b> The patient exhibits a striking facial asymmetry with prominent features on one side of the face. The left side appears more developed, with a larger eye, fuller cheek, and a slightly more pronounced nose. The right side shows a smaller eye, less defined cheek, and a narrower nose. The forehead also appears uneven, with a more pronounced central furrow on the left side.</p> <p><b>Left Eye:</b> The left eye is larger than the right, with a deep-set appearance and a prominent brow ridge. The eyelid margin is well-defined, and there is a noticeable difference in the size and shape of the eye socket.</p> <p><b>Right Eye:</b> The right eye is smaller and appears shallower, with a less defined brow ridge. The eyelid margin is less prominent, and the eye socket is less pronounced compared to the left.</p> <p><b>Nose:</b> The nose on the left side is broader and more prominent, with a wider nasal bridge and a more defined tip. The right side of the nose is narrower and less defined.</p> <p><b>Mouth/Lips:</b> The mouth on the left side appears larger and more open, with a fuller lower lip. The right side of the mouth is smaller and less defined.</p> <p><b>Diagnostic Suggestion:</b> The patient's cleft lip and palate along with midface hypoplasia may indicate a syndrome such as Pierre-Robin Sequence or Treacher Collins Syndrome; a multidisciplinary evaluation involving a pediatrician, geneticist, orthodontist, and craniofacial specialist is recommended for diagnosis and management planning, along with genetic counseling and testing.</p> |

Figure S14. **Low-Similarity Case.** The real report describes normal symmetry, while the synthetic report notes asymmetry and deviation, showing the VLM interprets synthetic structure differently.

**BioBERT semantic similarity analysis** We report the detailed results of the semantic similarity analysis between real and synthetic phenotype descriptions. Similarity scores were computed using BioBERT embeddings across five facial regions and an overall report segment. Table S8 summarizes the mean and standard deviation of cosine similarities across the dataset. The highest alignment was observed in the nose and eye regions, while the mouth/lips showed slightly greater variability.

**TF-IDF comparison** To complement the analysis presented above, we conducted a parallel evaluation using a traditional text similarity method based on TF-IDF [2] (Table S8). For each facial region and the overall report, we computed cosine similarity between real and synthetic descriptions using scikit-learn [4]’s `TfidfVectorizer`.

Table S8. Semantic similarity and TF-IDF-based semantic similarity across five facial regions.

| Region     | BioBERT Similarity Score | TF-IDF Similarity Score |
|------------|--------------------------|-------------------------|
| Overall    | 0.8404 (0.0748)          | 0.7630 (0.0707)         |
| Left Eye   | 0.7485 (0.1228)          | 0.4364 (0.1358)         |
| Right Eye  | 0.7535 (0.1423)          | 0.4578 (0.1352)         |
| Nose       | 0.7712 (0.1344)          | 0.4315 (0.1432)         |
| Mouth/Lips | 0.7355 (0.1376)          | 0.4612 (0.1321)         |

These findings support the need for domain-specific semantic models when evaluating medical text. TF-IDF-based comparisons fail to fully capture conceptual similarity in phenotype language. While overall similarity trends are consistent, the lower region-wise scores highlight the limitations of surface-level lexical methods when applied to clinical narratives.

### G.3. Uncertainty and robustness analysis

Figure S15 complements the uncertainty analysis in the main text by visualizing the distribution of uncertainty scores across all samples. 75% of the cases exhibit low uncertainty (< 0.14), indicating stable and consistent phenotype descriptions under stochastic sampling.

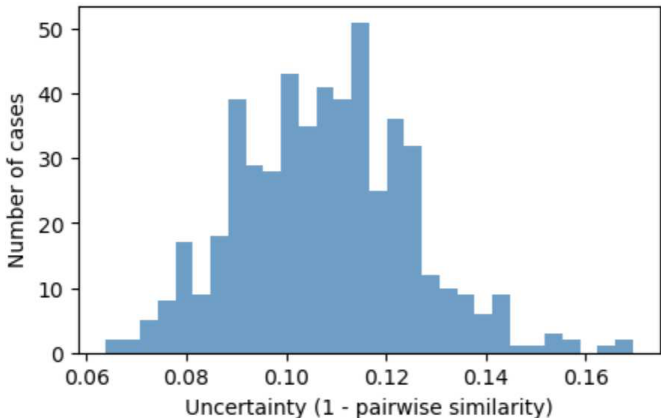

Figure S15. Distribution of uncertainty scores across all cases.

To further assess robustness, Table S9 reports cross-model phenotype similarity between Qwen2.5-VL and LLaVA-NeXT. The results show consistent similarity ranges across real and synthetic images, supporting that the evaluation is not sensitive to the choice of VLM.

Table S9. Cross-model phenotype similarity.

|                         | LLaVA (Real)    | LLaVA (Synthetic) |
|-------------------------|-----------------|-------------------|
| <b>Qwen (Real)</b>      | 0.7053 (0.0711) | 0.7176 (0.0691)   |
| <b>Qwen (Synthetic)</b> | 0.7204 (0.0726) | 0.7355 (0.0730)   |

## H. Regional analysis and potential bias

To assess potential bias in both classification performance and synthetic data evaluation, we analyze model behavior across geographic regions. However, population-level demographic attributes (e.g., ethnicity, ancestry, or skin tone) are not available in our dataset, as web-scraped rare disease case reports rarely provide standardized annotations. As a proxy, we stratify the data by geographic region (the only consistently recoverable attribute) and group samples into four regions: **Africa**, **Americas**, **Asia**, and **Europe**.

**Regional diagnosis performance.** We report Top- $k$  accuracy for supervised learning across regions in Figure S16a. While minor variations are observed at lower  $k$ , performance trends are broadly consistent across regions and converge as  $k$  increases, indicating similar generalization behavior as the results in main text.

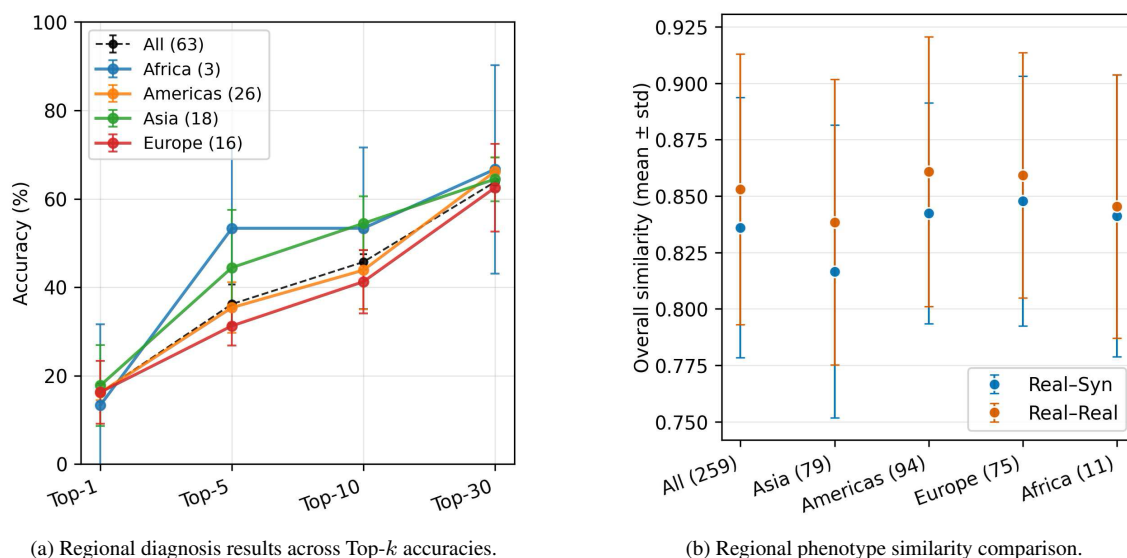

Figure S16. **Regional analysis across geographic groups.**

**Regional phenotype similarity.** We further evaluate phenotype similarity across regions using VLM-generated reports (Figure S16b). Real-synthetic similarity is comparable to real-real similarity across all regions within statistical uncertainty, suggesting that synthetic data preserves phenotype characteristics without introducing substantial regional bias. Notably, the Americas region shows slightly higher similarity scores, which may reflect a larger representation of cases from this region in the dataset. However, the overall consistency across regions supports the generalizability of our findings.

**Limitations.** We note that geographic region is only a coarse proxy and does not directly correspond to demographic attributes such as skin tone or ancestry. In addition, potential collection bias in publicly available case imagery may influence both classification and generative models. Future work should prioritize the collection of more diverse and well-annotated datasets to enable more granular analysis of demographic bias and ensure equitable performance across all patient populations and the development of synthetic data generation methods that explicitly account for demographic diversity.

## I. Statistical reporting details

All reported results in this paper include 1-sigma error bars, expressed as the standard deviation in parentheses (e.g., 6.90 (1.45)), computed over 5-fold cross-validation. The primary source of variability is the random train/test split across folds. For each configuration, we evaluate performance on the held-out fold and report the sample mean and standard deviation across the five runs. We assume approximately normally distributed metrics across folds, which is common in classification evaluation under low-data regimes. No additional sources of randomness (e.g., weight initialization or stochastic sampling) are varied unless explicitly stated.

Standard deviation is calculated using the unbiased estimator (i.e., Bessel’s correction):

$$\text{std}(x_1, \dots, x_n) = \sqrt{\frac{1}{n-1} \sum_{i=1}^n (x_i - \bar{x})^2}$$

This computation is implemented via NumPy [1]’s `np.std(..., ddof=1)` function.

## J. Hyperparameter settings and training details

We summarize the key hyperparameters used in our benchmark experiments across three experimental settings in Table S10, S11, S12, and S13.

### J.1. Standard supervised classification

Table S10. Hyperparameters for standard supervised classification experiments.

| Parameter           | Value                                                                                  |
|---------------------|----------------------------------------------------------------------------------------|
| Optimizer           | Adam                                                                                   |
| Learning rate       | $1e^{-4}$                                                                              |
| Batch size          | 32                                                                                     |
| Training folds      | 5-fold class split                                                                     |
| Number of epochs    | 50                                                                                     |
| Loss function       | CrossEntropyLoss                                                                       |
| Weight decay        | $1e^{-4}$                                                                              |
| Image size          | $224 \times 224$                                                                       |
| Pretrained backbone | ImageNet for ResNet, DenseNet, Swin-T, CLIP<br>VggFace2 for FaceNet<br>VggFace for VGG |

### J.2. Few-Shot learning

Table S11. Hyperparameters for Prototypical Networks.

| Parameter         | Value                          |
|-------------------|--------------------------------|
| Optimizer         | Adam                           |
| Learning rate     | $1e^{-3}$                      |
| Batch size        | 1                              |
| Training folds    | 5-fold class split             |
| Episodes per fold | 600 train / 100 val / 200 test |
| Loss function     | CrossEntropyLoss               |
| Distance metric   | Euclidean Distance             |

### J.3. Synthetic data generation

Table S12. Training settings for DreamBooth per disease class.

| Parameter        | Value / Description                  |
|------------------|--------------------------------------|
| Base model       | SG161222/Realistic_Vision_V5.1_noVAE |
| Training setting | Class-conditioned (per disease)      |
| Text prompt      | "a child with [DISEASE] disease"     |
| Training steps   | 800 per class                        |
| Batch size       | 1                                    |
| Learning rate    | $1e^{-6}$                            |
| Image resolution | $512 \times 512$                     |
| Mixed precision  | fp16                                 |
| Safety checker   | NSFW filter                          |

Table S13. Training settings for FastGAN on pooled real images.

| Parameter        | Value / Description                      |
|------------------|------------------------------------------|
| Architecture     | Original FastGAN (skip-layer excitation) |
| Training setting | Unconditional (no class labels)          |
| Iterations       | 80,000                                   |
| Batch size       | 8                                        |
| Optimizer        | Adam                                     |
| Learning rate    | $2e^{-4}$                                |
| Image resolution | $512 \times 512$                         |

### J.4. Hardware and compute resources

Standard supervised classification, few-shot learning, DreamBooth, and FastGAN models were all implemented in PyTorch [3] and trained using a single NVIDIA A100 GPU with 80GB of memory (also used for VLM-based report generation). Specifically, standard supervised classification and few-shot learning required approximately 240 and 550 minutes of training time, respectively, for downstream analysis. DreamBooth required 30–50 minutes of training per class, depending on the number of input images and prompt complexity, while FastGAN training took approximately 15 hours to converge.

### References

- [1] Charles R. Harris, K. Jarrod Millman, Stéfan J. van der Walt, Ralf Gommers, Pauli Virtanen, David Cournapeau, Eric Wieser, Julian Taylor, Sebastian Berg, Nathaniel J. Smith, Robert Kern, Matti Picus, Stephan Hoyer, Marten H. van Kerkwijk, Matthew Brett, Allan Haldane, Jaime Fernández del Río, Mark Wiebe, Pearu Peterson, Pierre Gérard-Marchant, Kevin Sheppard, Tyler Reddy, Warren Weckesser, Hameer Abbasi, Christoph Gohlke, and Travis E. Oliphant. Array programming with NumPy. *Nature*, 585(7825):357–362, 2020. 20
- [2] Christopher D Manning. *An introduction to information retrieval*. Cambridge University Press, 2009. 18
- [3] Adam Paszke, Sam Gross, Francisco Massa, Adam Lerer, James Bradbury, Gregory Chanan, Trevor Killeen, Zeming Lin, Natalia Gimelshein, Luca Antiga, Alban Desmaison, Andreas Köpf, Edward Yang, Zach DeVito, Martin Raison, Alykhan Tejani, Sasank Chilamkurthy, Benoit Steiner, Lu Fang, Junjie Bai, and Soumith Chintala. *PyTorch: an imperative style, high-performance deep learning library*. Curran Associates Inc., Red Hook, NY, USA, 2019. 21
- [4] F. Pedregosa, G. Varoquaux, A. Gramfort, V. Michel, B. Thirion, O. Grisel, M. Blondel, P. Prettenhofer, R. Weiss, V. Dubourg, J. Vanderplas, A. Passos, D. Cournapeau, M. Brucher, M. Perrot, and E. Duchesnay. Scikit-learn: Machine learning in Python. *Journal of Machine Learning Research*, 12:2825–2830, 2011. 18
